# Supplementary material for: Activation of SIRT6 by DNA hypomethylating agents and clinical consequences on combination therapy in leukemia
Source: PubMed Central journal article supplement (PMC7316973; doi:10.1038/s41598-020-67170-8), 2020-06-25
Supplement: 41598_2020_67170_MOESM1_ESM.pdf [file 41598_2020_67170_MOESM1_ESM.pdf]

## Supplementary Data

### Activation of SIRT6 by DNA hypomethylating agents and clinical consequences on combination therapy in leukemia

Hetty E. Carraway<sup>1</sup>, Sridhar A. Malkaram<sup>2</sup>, Yana Cen<sup>3,\*</sup>, Aymen Shatnawi<sup>4</sup>, Jun Fan<sup>5</sup>, Hamdy EA Ali<sup>6</sup>, Zakaria Y. Abd Elmageed<sup>6</sup>, Thomm Buttolph<sup>7</sup>, James Denvir<sup>5</sup>, Donald A. Primerano<sup>5</sup>, Tamer E. Fandy<sup>4,#</sup>

<sup>1</sup>Taussig Cancer Institute, Cleveland Clinic, Cleveland, OH. <sup>2</sup>Department of Biology, West Virginia State University, Institute, WV. <sup>3</sup>Department of Pharmaceutical Sciences, Albany College of Pharmacy, Colchester, VT. <sup>4</sup>Department of Pharmaceutical & Administrative Sciences, University of Charleston, Charleston, WV. <sup>5</sup>Department of Biomedical Sciences, Marshall University, Huntington, WV. <sup>6</sup>Department of Pharmaceutical Sciences, Texas A&M University, Kingsville, TX <sup>7</sup>Department of Neurological Sciences, University of Vermont, Burlington, VT.

\*Current address: Department of Medicinal Chemistry, Virginia Commonwealth University, Richmond, VA 23219

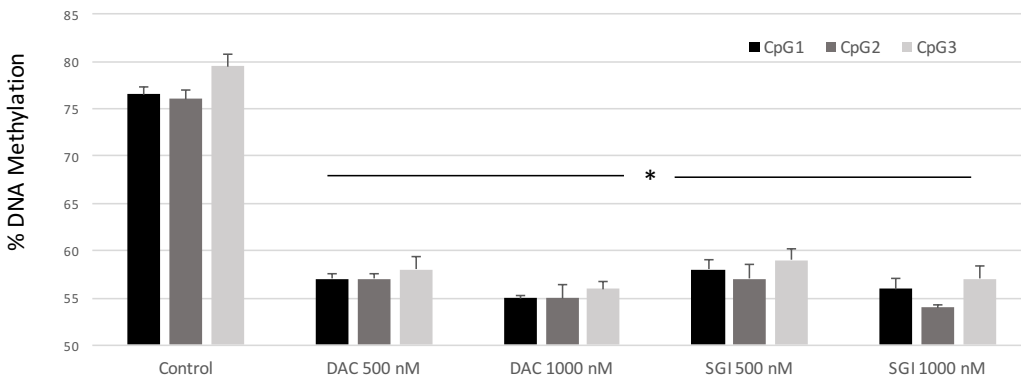

**Figure 1. Comparing the DNA hypomethylating activity of DHA.** CEM leukemia cells were treated with different concentrations of decitabine (DAC) or guadecitabine (SGI-110) for 48 h followed by DNA extraction, DNA bisulfite treatment and DNA pyrosequencing of three CpG sites in the LINE-1 sequence (GenBank accession number X58075) as described under methods. Data represent the average of duplicates  $\pm$  SD. \* indicates significant difference from control at  $p < 0.05$ .

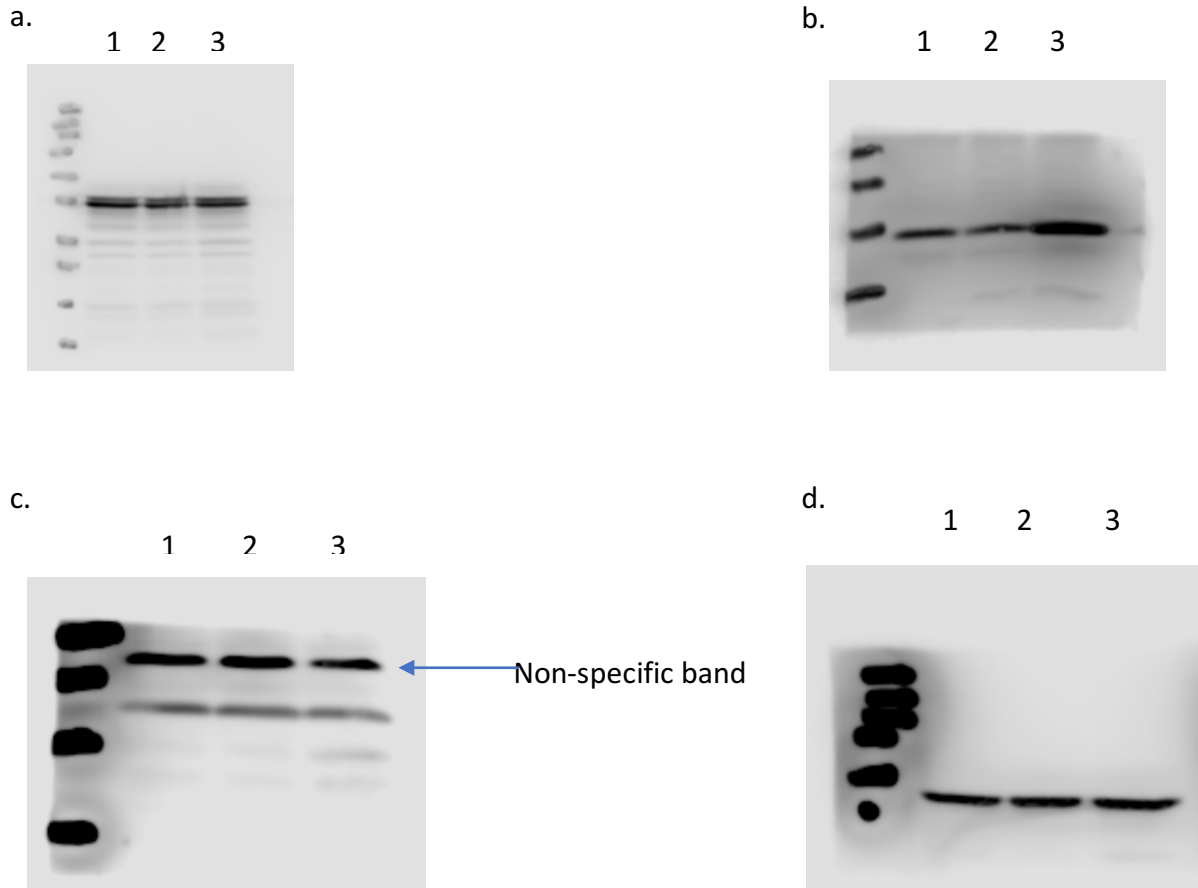

**Figure 2.** Full length separate western blots of **a.** SIRT6 (37 kDa), **b.** H3K9Ac (17 kDa), **c.** H3K56Ac (17 kDa) and **d.** beta-actin depicted as Figure 3d in the manuscript. Lane 1 represents control cells and lanes 2 and 3 represent U937 cells treated with DAC (500 nM) for 24 and 48 h, respectively.

a.

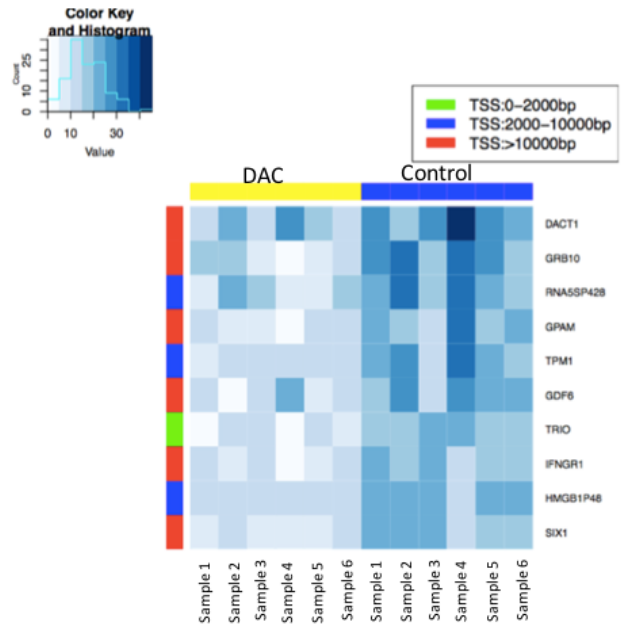

b.

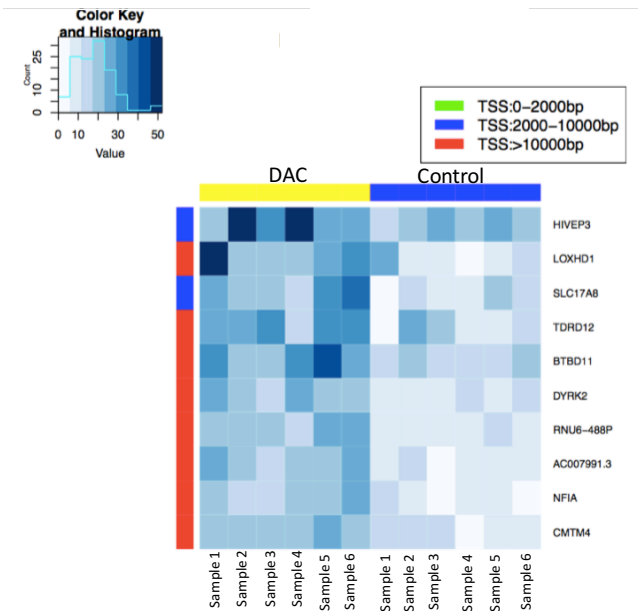

**Figure 3. Heatmaps showing the top 10 gene changes in H3K9 acetylation in AML patient samples treated with DAC.** Bone marrow samples from six AML patients were treated with DAC 500 nM for 72 h and H3K9 acetylation was analyzed by ChIP-Seq as described under methods. Figure 3a. shows the top 10 genes showing H3K9 acetylation decrease after DAC treatment and Figure 3b. shows the top 10 genes showing H3K9 acetylation increase after DAC treatment. The colored scale at the right of the heatmap shows the position of acetylation change relative to the Transcription Start Site (TSS). The histogram inset at the top shows the value (read count of the peaks) against the count (the number of times those read counts are observed in the heatmap).

**Table 1.** List of genes showing decrease in H3K9 acetylation after DAC treatment. Gray shading indicates acetylation decrease within 2000 bp upstream the TSS.

| Gene symbol | Gene biotype                       | Fold change | Distance from TSS | p-value *10 <sup>-4</sup> | Adjusted p-value |
|-------------|------------------------------------|-------------|-------------------|---------------------------|------------------|
| AC002059.2  | Transcribed unprocessed pseudogene | -1.7        | 592               | 0.5                       | 0.20             |
| AC006333.2  | antisense                          | -1.6        | -467              | 0.5                       | 0.20             |
| AC008837.2  | processed_pseudogene               | -1.6        | 48121             | 0.8                       | 0.21             |
| AC021683.5  | lincRNA                            | -1.7        | 108769            | 0.09                      | 0.20             |
| AC022558.2  | antisense                          | -1.7        | 28117             | 0.7                       | 0.21             |
| AC064807.1  | antisense                          | -1.5        | -824              | 0.9                       | 0.21             |
| AC123912.5  | processed_pseudogene               | -1.8        | -19674            | 0.8                       | 0.21             |
| ACTG1P21    | processed_pseudogene               | -1.7        | -4163             | 0.3                       | 0.20             |
| ADARB2      | protein_coding                     | -1.7        | -534875           | 1                         | 0.21             |
| AGAP1       | protein_coding                     | -1.9        | 558012            | 0.2                       | 0.20             |
| AL022318.4  | protein_coding                     | -1.6        | -62               | 0.6                       | 0.21             |
| AL137145.1  | lincRNA                            | -1.7        | 35785             | 0.2                       | 0.20             |
| AL596087.2  | sense_intronic                     | -1.5        | -694              | 1                         | 0.23             |
| ANKRD39     | protein_coding                     | -1.7        | -2794             | 2                         | 0.30             |
| ATAD2B      | protein_coding                     | -1.6        | -91213            | 0.5                       | 0.20             |
| BCO1        | protein_coding                     | -2.1        | 52953             | 0.9                       | 0.20             |
| BMS1P1      | transcribed_unprocessed_pseudogene | -1.8        | -173              | 0.4                       | 0.20             |
| CACNA1C     | protein_coding                     | -1.8        | 468115            | 0.4                       | 0.20             |
| CAP1        | protein_coding                     | -1.8        | -28932            | 0.6                       | 0.20             |
| CCDC171     | protein_coding                     | -2.0        | 567915            | 0.2                       | 0.20             |
| CECR2       | protein_coding                     | -1.8        | 60852             | 0.9                       | 0.21             |
| CFAP61      | protein_coding                     | -1.7        | -813              | 0.4                       | 0.20             |
| COQ3        | protein_coding                     | -1.8        | -303              | 0.5                       | 0.20             |
| COQ8A       | protein_coding                     | -1.9        | 41065             | 0.5                       | 0.20             |
| CUX1        | protein_coding                     | -1.7        | -72603            | 0.05                      | 0.20             |
| DACT1       | protein_coding                     | -2.3        | -2966             | 0.1                       | 0.20             |
| DCAF17      | protein_coding                     | -1.6        | 384               | 0.8                       | 0.21             |
| DIP2C       | protein_coding                     | -1.8        | -389667           | 0.2                       | 0.20             |
| DLK1        | protein_coding                     | -1.8        | 5696              | 0.2                       | 0.20             |
| DTX3L       | protein_coding                     | -1.6        | -537              | 0.6                       | 0.20             |

|           |                        |      |         |      |      |
|-----------|------------------------|------|---------|------|------|
| EEA1      | protein_coding         | -2.0 | -74930  | 0.8  | 0.21 |
| EPN1      | protein_coding         | -1.6 | 24875   | 0.9  | 0.21 |
| FAM129B   | protein_coding         | -1.9 | -23288  | 0.7  | 0.21 |
| FNDC8     | protein_coding         | -1.8 | 2522    | 5    | 0.90 |
| GALNT18   | protein_coding         | -1.8 | -198604 | 0.5  | 0.20 |
| GAREM2    | protein_coding         | -1.6 | 13510   | 0.1  | 0.20 |
| GDF6      | protein_coding         | -2.2 | -5791   | 0.4  | 0.20 |
| GPAM      | protein_coding         | -2.2 | -368976 | 0.8  | 0.21 |
| GRB10     | protein_coding         | -2.3 | -171761 | 0.1  | 0.20 |
| HAND2     | protein_coding         | -1.9 | -13028  | 0.6  | 0.20 |
| HMGB1P48  | unprocessed_pseudogene | -2.2 | -826    | 0.5  | 0.20 |
| HOXB8     | protein_coding         | -1.7 | -1738   | 0.2  | 0.20 |
| HSPA9     | protein_coding         | -1.6 | -823    | 0.6  | 0.20 |
| ICA1L     | protein_coding         | -1.9 | -1584   | 0.3  | 0.20 |
| IFNGR1    | protein_coding         | -2.2 | 92852   | 0.4  | 0.20 |
| IRF8      | protein_coding         | -1.8 | 298     | 1    | 0.21 |
| KLF13     | protein_coding         | -1.5 | -1354   | 0.2  | 0.20 |
| KMT5B     | protein_coding         | -1.8 | -30727  | 0.7  | 0.21 |
| KPNA2     | protein_coding         | -1.9 | -518    | 0.9  | 0.21 |
| LINC02360 | lincRNA                | -2.1 | -24267  | 0.7  | 0.21 |
| LINC02580 | lincRNA                | -2.1 | 38010   | 0.8  | 0.21 |
| MAP4K2    | protein_coding         | -1.6 | -10940  | 0.8  | 0.21 |
| ME2       | protein_coding         | -2.1 | 5767    | 0.2  | 0.20 |
| MGA       | protein_coding         | -1.7 | 39577   | 0.4  | 0.20 |
| MIR193A   | miRNA                  | -1.8 | -1995   | 0.8  | 0.21 |
| MPP5      | protein_coding         | -1.9 | -908    | 0.1  | 0.20 |
| MT2A      | protein_coding         | -1.7 | -398    | 0.5  | 0.20 |
| NAPG      | protein_coding         | -2.0 | 18896   | 1    | 0.25 |
| NDC1      | protein_coding         | -1.8 | -559    | 0.3  | 0.20 |
| NDUFA10   | protein_coding         | -1.7 | -86001  | 0.7  | 0.21 |
| OR2B11    | protein_coding         | -2.0 | 10796   | 0.05 | 0.20 |
| OXSM      | protein_coding         | -1.5 | 184     | 0.6  | 0.20 |
| PIK3C2B   | protein_coding         | -2.0 | -37223  | 0.5  | 0.20 |
| PKD1L2    | polymorphic_pseudogene | -2.1 | -119769 | 0.08 | 0.20 |
| PLA2G2E   | protein_coding         | -1.7 | -4316   | 0.6  | 0.20 |
| PLCH1     | protein_coding         | -1.7 | -203466 | 0.7  | 0.21 |
| PPP1R1C   | protein_coding         | -2.0 | 35160   | 0.4  | 0.20 |
| PRRC1     | protein_coding         | -1.8 | 51992   | 0.6  | 0.20 |
| PTCH1     | protein_coding         | -1.8 | 34544   | 0.4  | 0.20 |

|            |                      |      |         |      |      |
|------------|----------------------|------|---------|------|------|
| RBPJ       | protein_coding       | -1.6 | 156846  | 0.02 | 0.20 |
| RCSD1      | protein_coding       | -1.6 | -292    | 0.4  | 0.20 |
| RNA5SP428  | rRNA_pseudogene      | -2.4 | -74508  | 0.9  | 0.21 |
| RNU6-1325P | snRNA                | -1.7 | 21938   | 0.5  | 0.20 |
| RNU6-1332P | snRNA                | -1.7 | -929    | 0.9  | 0.21 |
| RPL7P6     | processed_pseudogene | -2.0 | -11350  | 0.2  | 0.20 |
| RPS6KA2    | protein_coding       | -1.7 | -429050 | 0.3  | 0.20 |
| RTRAF      | protein_coding       | -1.7 | -474    | 0.4  | 0.2  |
| SIX1       | protein_coding       | -2.2 | 2242    | 0.4  | 0.2  |
| SLC9A1     | protein_coding       | -1.8 | -11980  | 0.8  | 0.21 |
| SNAP23     | protein_coding       | -2.0 | -332    | 0.4  | 0.20 |
| SNHG5      | processed_transcript | -1.9 | -1047   | 0.4  | 0.20 |
| SPAG16     | protein_coding       | -1.7 | 749422  | 0.7  | 0.21 |
| SRCIN1     | protein_coding       | -2.1 | -48529  | 0.2  | 0.20 |
| TBL1XR1    | protein_coding       | -2.0 | -32299  | 0.5  | 0.20 |
| TENM4      | protein_coding       | -1.8 | -479747 | 0.5  | 0.20 |
| TM2D3      | protein_coding       | -1.8 | -34590  | 0.8  | 0.21 |
| TMEM62     | protein_coding       | -1.5 | 9822    | 0.7  | 0.21 |
| TNFAIP8    | protein_coding       | -1.6 | -591    | 0.1  | 0.20 |
| TNFSF14    | protein_coding       | -1.9 | 113     | 0.02 | 0.20 |
| TPM1       | protein_coding       | -2.2 | 25769   | 0.9  | 0.21 |
| TRIO       | protein_coding       | -2.4 | 411399  | 0.1  | 0.20 |
| UACA       | protein_coding       | -1.9 | -1792   | 0.4  | 0.20 |
| UTP18      | protein_coding       | -1.6 | 173     | 0.8  | 0.21 |
| VCPIP1     | protein_coding       | -1.9 | -43316  | 0.1  | 0.20 |
| VIPR2      | protein_coding       | -1.8 | -60456  | 0.3  | 0.20 |
| VPS13C     | protein_coding       | -1.6 | -972    | 0.7  | 0.21 |
| VWF        | protein_coding       | -1.7 | -156769 | 0.2  | 0.20 |
| WDR27      | protein_coding       | -1.7 | -221766 | 0.8  | 0.21 |
| ZBTB7A     | protein_coding       | -1.6 | -1244   | 1    | 0.21 |
| ZC3H12D    | protein_coding       | -1.8 | -2560   | 0.4  | 0.20 |
| ZIC4       | protein_coding       | -1.8 | -16859  | 0.7  | 0.21 |
| ZSCAN20    | protein_coding       | -1.7 | -944    | 0.1  | 0.20 |

**Table 2.** List of genes showing increase in H3K9 acetylation after DAC treatment. Gray shading indicates acetylation increase within 2000 bp upstream the TSS.

| Gene symbol | Gene biotype         | Fold change | Distance from TSS | p-value *10 <sup>-4</sup> | Adjusted p-value |
|-------------|----------------------|-------------|-------------------|---------------------------|------------------|
| AC007991.3  | antisense            | 2.4         | -63347            | 0.5                       | 0.20             |
| AC009123.1  | antisense            | 1.6         | -52               | 0.8                       | 0.21             |
| AC023509.2  | antisense            | 1.8         | 2917              | 0.4                       | 0.20             |
| AC027373.1  | sense_overlapping    | 1.8         | -8887             | 0.4                       | 0.20             |
| AC087863.1  | lincRNA              | 1.6         | -65229            | 0.8                       | 0.21             |
| AC092266.1  | processed_pseudogene | 1.9         | 153042            | 0.9                       | 0.21             |
| ACOT7       | protein_coding       | 1.7         | -108790           | 0.4                       | 0.20             |
| ADCY1       | protein_coding       | 1.9         | 84961             | 0.3                       | 0.20             |
| AKR7A2      | protein_coding       | 1.8         | -5645             | 0.1                       | 0.20             |
| AL022318.1  | lincRNA              | 1.9         | 14474             | 0.4                       | 0.20             |
| AL162595.2  | antisense            | 1.8         | -33961            | 0.2                       | 0.20             |
| AL590438.1  | lincRNA              | 1.7         | -1095             | 0.8                       | 0.21             |
| AL592429.2  | antisense            | 1.9         | 191939            | 0.1                       | 0.20             |
| AL669970.3  | lincRNA              | 2.1         | 4719              | 0.3                       | 0.20             |
| ALX3        | protein_coding       | 1.9         | -4699             | 0.2                       | 0.20             |
| ARHGEF7     | protein_coding       | 1.8         | 183242            | 4                         | 0.72             |
| ATP2A3      | protein_coding       | 1.5         | -7663             | 3                         | 0.5              |
| ATP6V0A2    | protein_coding       | 2.0         | -2417             | 0.3                       | 0.20             |
| BAHD1       | protein_coding       | 2.1         | 17180             | 0.6                       | 0.20             |
| BCAR1       | protein_coding       | 2.0         | -38052            | 0.1                       | 0.20             |
| BEGAIN      | protein_coding       | 1.8         | -4012             | 0.5                       | 0.20             |
| BTBD11      | protein_coding       | 2.2         | 13588             | 0.2                       | 0.20             |
| C19orf18    | protein_coding       | 1.8         | -1733             | 0.9                       | 0.21             |
| CAMTA1      | protein_coding       | 1.9         | 214277            | 0.3                       | 0.20             |
| CAPN5       | protein_coding       | 1.8         | 27460             | 0.7                       | 0.20             |
| CARNS1      | protein_coding       | 1.8         | 6833              | 0.5                       | 0.20             |
| CD276       | protein_coding       | 1.7         | 28235             | 1                         | 0.24             |
| CMTM4       | protein_coding       | 2.2         | -14006            | 0.5                       | 0.20             |
| CNTNAP5     | protein_coding       | 1.8         | 186914            | 2                         | 0.46             |
| COLQ        | protein_coding       | 1.8         | -67950            | 0.8                       | 0.21             |



|           |                        |     |         |      |      |
|-----------|------------------------|-----|---------|------|------|
|           |                        |     |         | 0.7  | 0.21 |
| CYP3A54P  | processed_pseudogene   | 2.0 | 21068   |      |      |
| DBF4B     | protein_coding         | 1.7 | 39093   | 1    | 0.21 |
| DIP2C     | protein_coding         | 1.7 | -133967 | 0.2  | 0.20 |
| DSCAML1   | protein_coding         | 2.1 | -132924 | 0.8  | 0.21 |
| DYRK2     | protein_coding         | 2.5 | 8663    | 0.2  | 0.20 |
| FUT5      | protein_coding         | 1.6 | -6439   | 0.2  | 0.20 |
| GNG7      | protein_coding         | 1.8 | -182908 | 0.5  | 0.20 |
| GPC1      | protein_coding         | 1.6 | 8830    | 1    | 0.27 |
| GSTA12P   | unprocessed_pseudogene | 2.1 | -1946   | 0.6  | 0.20 |
| GYPC      | protein_coding         | 1.9 | 17868   | 0.1  | 0.20 |
| HIVEP3    | protein_coding         | 2.3 | -169724 | 0.3  | 0.20 |
| HNRNPA3P5 | processed_pseudogene   | 1.6 | -5963   | 3    | 0.5  |
| INPP5D    | protein_coding         | 1.7 | 124434  | 1    | 0.25 |
| INSRR     | protein_coding         | 1.7 | -12917  | 3    | 0.57 |
| KAZN      | protein_coding         | 2.1 | 959609  | 0.4  | 0.20 |
| LINC00929 | lincRNA                | 1.8 | 9688    | 0.06 | 0.20 |
| LINC02540 | lincRNA                | 2.0 | -60922  | 0.9  | 0.21 |
| LOXHD1    | protein_coding         | 2.4 | -10619  | 0.2  | 0.20 |
| LYPD8     | protein_coding         | 1.8 | 5562    | 0.2  | 0.20 |
| MFNG      | protein_coding         | 1.6 | -7700   | 0.4  | 0.20 |
| MGAT3     | protein_coding         | 1.8 | 34357   | 0.1  | 0.20 |
| MRPL55    | protein_coding         | 1.6 | -3611   | 0.4  | 0.20 |
| MYCBPAP   | protein_coding         | 1.7 | 18317   | 0.7  | 0.21 |
| NFIA      | protein_coding         | 2.6 | 324142  | 0.4  | 0.20 |
| OTOF      | protein_coding         | 1.7 | -88397  | 0.6  | 0.20 |
| PALD1     | protein_coding         | 2.0 | -12020  | 0.5  | 0.20 |
| PCNT      | protein_coding         | 1.7 | 33179   | 1    | 0.21 |
| PDZRN3    | protein_coding         | 2.1 | -251439 | 0.3  | 0.20 |
| PIRT      | protein_coding         | 1.7 | -1444   | 0.4  | 0.20 |
| PKD1L1    | protein_coding         | 1.7 | -58990  | 0.8  | 0.21 |
| PNMA8A    | protein_coding         | 2.1 | -6062   | 0.7  | 0.21 |
| PRDM16    | protein_coding         | 1.7 | 314133  | 0.7  | 0.21 |

|            |                      |     |         |     |      |
|------------|----------------------|-----|---------|-----|------|
| PROX1-AS1  | processed_transcript | 1.8 | -180707 | 1   | 0.26 |
| PTK6       | protein_coding       | 1.7 | -4269   | 0.4 | 0.20 |
| RAB3IL1    | protein_coding       | 1.7 | -16668  | 0.9 | 0.21 |
| RHOBTB2    | protein_coding       | 2.0 | 5484    | 0.6 | 0.20 |
| RNU6-1051P | snRNA                | 2.0 | -105604 | 0.7 | 0.21 |
| RNU6-1077P | snRNA                | 1.8 | -4936   | 0.9 | 0.21 |
| RNU6-488P  | snRNA                | 2.7 | 8637    | 0.3 | 0.20 |
| RPL9P21    | processed_pseudogene | 2.2 | 20448   | 2   | 0.32 |
| SCAP       | protein_coding       | 1.7 | -925    | 0.9 | 0.21 |
| SCUBE1     | protein_coding       | 1.6 | -10987  | 0.7 | 0.21 |
| SLC16A5    | protein_coding       | 1.7 | 8274    | 0.9 | 0.21 |
| SLC17A8    | protein_coding       | 2.4 | 74222   | 0.8 | 0.21 |
| SLC35F3    | protein_coding       | 1.9 | 321968  | 0.5 | 0.20 |
| SLC43A1    | protein_coding       | 1.6 | -24485  | 1   | 0.21 |
| SLC9A5     | protein_coding       | 2.0 | 818     | 0.2 | 0.20 |
| SNX18P13   | processed_pseudogene | 2.0 | 313     | 0.3 | 0.20 |
| SPIRE2     | protein_coding       | 1.8 | 28122   | 2   | 0.47 |
| TBC1D22A   | protein_coding       | 1.6 | 171284  | 3   | 0.5  |
| TDRD12     | protein_coding       | 2.4 | 40948   | 0.5 | 0.20 |
| TMEM91     | protein_coding       | 1.7 | 23890   | 0.5 | 0.20 |
| TRIB1      | protein_coding       | 1.8 | -3120   | 0.3 | 0.20 |
